# Supplementary material for: Description of a new horned toad of Megophrys Kuhl & Van Hasselt, 1822 (Anura, Megophryidae) from southwest China
Source: Zookeys. 2020 Oct 7;974:131–59. doi: 10.3897/zookeys.974.56070 (PMC7557532; doi:10.3897/zookeys.974.56070)
Supplement: Supplementary material 1 — Table S1 [file zookeys-974-131-s001.xlsx]

## Sheet: Sheet1
Table S1. Uncorrected p-distances between the Megophrys species based on COI gene sequences.
		1	2	3	4	5	6	7	8	9	10	11	12	13	14	15	16	17	18	19	20	21	22	23	24	25	26	27	28	29	30	31	32	33	34	35	36	37	38	39	40	41	42	43	44	45	46	47	48
1	Megophrys qianbeiensis sp. nov.
2	Megophrys sangzhiensis	0.043
3	Megophrys spinata	0.047	0.036
4	Megophrys binlingensis	0.047	0.068	0.077
5	Megophrys binchuanensis	0.068	0.086	0.093	0.07
6	Megophrys palpebralespinosa	0.106	0.111	0.113	0.096	0.102
7	Megophrys omeimontis	0.089	0.1	0.109	0.082	0.088	0.123
8	Megophrys wuliangshanensis	0.088	0.1	0.107	0.093	0.08	0.116	0.105
9	Megophrys daweimontis	0.097	0.109	0.118	0.088	0.096	0.12	0.111	0.102
10	Megophrys jingdongensis	0.111	0.117	0.116	0.101	0.095	0.109	0.122	0.097	0.099
11	Megophrys minor	0.122	0.132	0.138	0.121	0.118	0.118	0.121	0.116	0.113	0.12
12	Megophrys jiangi	0.127	0.127	0.143	0.12	0.127	0.134	0.136	0.147	0.148	0.153	0.086
13	Megophrys chisuiensis	0.145	0.148	0.161	0.134	0.145	0.148	0.143	0.127	0.141	0.151	0.068	0.091
14	Megophrys dongguanensis	0.152	0.159	0.163	0.141	0.15	0.152	0.17	0.15	0.171	0.147	0.15	0.17	0.168
15	Megophrys nankunensis	0.166	0.17	0.177	0.154	0.154	0.179	0.164	0.157	0.182	0.155	0.157	0.175	0.164	0.071
16	Megophrys wugongensis	0.138	0.145	0.141	0.136	0.143	0.163	0.155	0.134	0.148	0.139	0.134	0.152	0.148	0.111	0.1
17	Megophrys xiangnanensis	0.157	0.161	0.175	0.155	0.152	0.168	0.159	0.148	0.171	0.149	0.159	0.159	0.163	0.121	0.114	0.1
18	Megophrys nanlingensis	0.147	0.147	0.157	0.134	0.145	0.159	0.159	0.141	0.154	0.137	0.134	0.154	0.164	0.107	0.102	0.084	0.088
19	Megophrys jinggangensis	0.156	0.152	0.157	0.143	0.145	0.166	0.145	0.145	0.15	0.135	0.134	0.152	0.157	0.111	0.114	0.105	0.113	0.089
20	Megophrys xianjuensis	0.125	0.148	0.149	0.12	0.126	0.141	0.147	0.128	0.136	0.119	0.119	0.136	0.141	0.119	0.124	0.103	0.128	0.105	0.115
21	Megophrys wushanensis	0.12	0.129	0.138	0.111	0.116	0.132	0.129	0.111	0.121	0.111	0.111	0.136	0.134	0.113	0.107	0.088	0.104	0.089	0.086	0.105
22	Megophrys baolongensis	0.141	0.15	0.155	0.127	0.136	0.15	0.139	0.139	0.145	0.143	0.121	0.145	0.141	0.123	0.114	0.121	0.12	0.113	0.125	0.12	0.063
23	Megophrys leishanensis	0.132	0.14	0.157	0.125	0.138	0.145	0.127	0.132	0.148	0.139	0.129	0.136	0.141	0.134	0.134	0.118	0.118	0.111	0.113	0.124	0.07	0.093
24	Megophrys yangmingensis	0.143	0.152	0.157	0.136	0.154	0.164	0.157	0.145	0.148	0.143	0.134	0.147	0.145	0.136	0.121	0.105	0.125	0.114	0.114	0.113	0.098	0.118	0.109
25	Megophrys shimentaina	0.147	0.159	0.163	0.139	0.143	0.145	0.159	0.148	0.159	0.139	0.139	0.163	0.159	0.136	0.138	0.121	0.13	0.116	0.105	0.124	0.088	0.116	0.116	0.091
26	Megophrys jiulianensis	0.14	0.15	0.161	0.136	0.143	0.154	0.15	0.129	0.146	0.145	0.125	0.143	0.13	0.138	0.134	0.116	0.136	0.121	0.12	0.122	0.08	0.098	0.105	0.1	0.105
27	Megophrys mirabilis	0.127	0.131	0.146	0.12	0.139	0.141	0.143	0.132	0.15	0.147	0.132	0.143	0.132	0.114	0.125	0.109	0.123	0.116	0.109	0.12	0.088	0.107	0.095	0.105	0.091	0.114
28	Megophrys tuberogranulata	0.123	0.134	0.143	0.114	0.136	0.152	0.129	0.127	0.143	0.126	0.127	0.141	0.13	0.134	0.13	0.105	0.127	0.107	0.12	0.105	0.07	0.089	0.095	0.104	0.093	0.104	0.079
29	Megophrys huangshanensis	0.125	0.131	0.15	0.121	0.129	0.154	0.152	0.127	0.138	0.135	0.121	0.143	0.143	0.116	0.127	0.111	0.13	0.096	0.105	0.105	0.089	0.113	0.102	0.114	0.113	0.093	0.095	0.098
30	Megophrys boettgeri	0.132	0.134	0.157	0.125	0.129	0.15	0.152	0.125	0.138	0.135	0.12	0.148	0.141	0.12	0.132	0.116	0.127	0.104	0.107	0.111	0.088	0.111	0.104	0.114	0.111	0.089	0.1	0.1	0.018
31	Megophrys mufumontana	0.148	0.154	0.163	0.134	0.143	0.145	0.152	0.13	0.138	0.145	0.121	0.163	0.138	0.123	0.134	0.118	0.116	0.111	0.113	0.12	0.1	0.104	0.113	0.102	0.114	0.114	0.102	0.111	0.098	0.091
32	Megophrys brachykolos	0.197	0.19	0.202	0.193	0.18	0.202	0.2	0.182	0.193	0.193	0.191	0.175	0.18	0.207	0.207	0.195	0.202	0.205	0.2	0.214	0.196	0.196	0.205	0.193	0.2	0.196	0.204	0.196	0.2	0.191	0.196
33	Megophrys gerti	0.175	0.186	0.182	0.186	0.186	0.193	0.195	0.193	0.198	0.177	0.182	0.191	0.198	0.213	0.205	0.204	0.193	0.198	0.198	0.189	0.184	0.189	0.188	0.191	0.189	0.193	0.198	0.195	0.182	0.188	0.195	0.221
34	Megophrys hansi	0.19	0.186	0.196	0.188	0.196	0.196	0.204	0.202	0.191	0.176	0.18	0.195	0.188	0.189	0.198	0.188	0.193	0.196	0.184	0.185	0.17	0.195	0.18	0.175	0.186	0.191	0.188	0.186	0.18	0.179	0.182	0.198	0.175
35	Megophrys microstoma	0.17	0.179	0.191	0.168	0.171	0.18	0.186	0.177	0.18	0.172	0.166	0.154	0.17	0.193	0.193	0.184	0.173	0.191	0.198	0.17	0.182	0.179	0.179	0.171	0.189	0.189	0.18	0.188	0.182	0.191	0.175	0.2	0.189	0.143
36	Megophrys pachyproctus	0.166	0.184	0.179	0.161	0.163	0.166	0.161	0.157	0.18	0.145	0.148	0.159	0.143	0.17	0.161	0.155	0.168	0.161	0.163	0.143	0.146	0.161	0.155	0.159	0.157	0.168	0.159	0.154	0.166	0.17	0.168	0.198	0.205	0.2	0.163
37	Megophrys stejnegeri	0.184	0.195	0.196	0.191	0.198	0.225	0.191	0.198	0.193	0.193	0.188	0.188	0.198	0.205	0.196	0.189	0.195	0.184	0.188	0.197	0.179	0.207	0.189	0.188	0.198	0.191	0.195	0.193	0.196	0.193	0.195	0.164	0.209	0.2	0.207	0.2
38	Megophrys ligayae	0.197	0.204	0.209	0.193	0.195	0.216	0.198	0.195	0.198	0.198	0.191	0.184	0.195	0.22	0.211	0.207	0.216	0.216	0.209	0.218	0.198	0.209	0.195	0.196	0.209	0.196	0.216	0.205	0.195	0.193	0.2	0.152	0.22	0.191	0.193	0.213	0.17
39	Megophrys nasuta	0.193	0.202	0.204	0.193	0.186	0.213	0.196	0.196	0.195	0.198	0.207	0.191	0.207	0.229	0.227	0.216	0.202	0.207	0.193	0.22	0.202	0.213	0.198	0.195	0.205	0.205	0.216	0.214	0.22	0.218	0.205	0.177	0.218	0.207	0.18	0.191	0.171	0.18
40	Megophrys edwardinae	0.15	0.166	0.164	0.146	0.159	0.161	0.182	0.157	0.159	0.151	0.13	0.148	0.157	0.132	0.136	0.118	0.139	0.123	0.134	0.098	0.132	0.148	0.15	0.127	0.139	0.146	0.146	0.129	0.136	0.138	0.13	0.191	0.214	0.195	0.182	0.163	0.207	0.214	0.223
41	Megophrys aceras	0.19	0.209	0.211	0.195	0.184	0.207	0.184	0.188	0.195	0.183	0.175	0.196	0.186	0.186	0.175	0.177	0.154	0.156	0.18	0.168	0.173	0.177	0.177	0.175	0.182	0.19	0.188	0.177	0.19	0.19	0.175	0.188	0.188	0.179	0.169	0.162	0.175	0.211	0.182	0.199
42	Megophrys maosonensis	0.174	0.181	0.18	0.179	0.161	0.173	0.164	0.164	0.173	0.168	0.154	0.166	0.166	0.17	0.171	0.17	0.161	0.166	0.171	0.168	0.168	0.18	0.155	0.17	0.171	0.188	0.161	0.168	0.175	0.173	0.157	0.198	0.2	0.198	0.161	0.155	0.196	0.211	0.184	0.186	0.179
43	Megophrys mangshanensis	0.168	0.179	0.182	0.17	0.166	0.184	0.157	0.168	0.166	0.162	0.163	0.172	0.173	0.179	0.18	0.184	0.173	0.168	0.179	0.159	0.171	0.175	0.168	0.182	0.18	0.188	0.168	0.161	0.179	0.175	0.17	0.205	0.207	0.211	0.177	0.163	0.2	0.213	0.188	0.193	0.179	0.043
44	Megophrys flavipunctata	0.161	0.175	0.179	0.155	0.163	0.184	0.173	0.157	0.157	0.158	0.171	0.174	0.177	0.191	0.195	0.171	0.18	0.175	0.179	0.163	0.168	0.177	0.15	0.161	0.163	0.18	0.168	0.163	0.168	0.173	0.166	0.213	0.182	0.177	0.145	0.171	0.196	0.193	0.186	0.179	0.192	0.104	0.098
45	Megophrys glandulosa	0.165	0.175	0.171	0.157	0.163	0.175	0.173	0.157	0.155	0.16	0.157	0.174	0.166	0.184	0.186	0.177	0.184	0.166	0.182	0.161	0.18	0.173	0.168	0.175	0.17	0.171	0.168	0.159	0.163	0.168	0.154	0.214	0.193	0.214	0.171	0.171	0.195	0.229	0.202	0.182	0.197	0.116	0.111	0.102
46	Megophrys medogensis	0.168	0.177	0.177	0.177	0.164	0.171	0.177	0.161	0.159	0.16	0.153	0.165	0.168	0.181	0.184	0.171	0.177	0.168	0.184	0.163	0.175	0.177	0.161	0.161	0.171	0.17	0.166	0.162	0.168	0.166	0.164	0.206	0.2	0.2	0.166	0.164	0.213	0.215	0.186	0.177	0.186	0.105	0.096	0.11	0.094
47	Megophrys periosa	0.168	0.168	0.179	0.164	0.168	0.182	0.164	0.166	0.168	0.172	0.168	0.166	0.168	0.173	0.17	0.166	0.163	0.18	0.173	0.141	0.171	0.175	0.141	0.164	0.177	0.157	0.163	0.159	0.168	0.17	0.17	0.218	0.202	0.198	0.161	0.173	0.209	0.204	0.209	0.182	0.197	0.111	0.098	0.095	0.096	0.101
48	Megophrys zhangi	0.17	0.181	0.184	0.164	0.168	0.182	0.159	0.177	0.177	0.172	0.171	0.17	0.168	0.186	0.18	0.177	0.164	0.188	0.179	0.172	0.177	0.163	0.155	0.179	0.17	0.166	0.163	0.157	0.173	0.171	0.171	0.2	0.214	0.207	0.159	0.173	0.196	0.2	0.189	0.188	0.201	0.113	0.107	0.107	0.096	0.108	0.088
49	Megophrys major	0.182	0.19	0.193	0.17	0.174	0.17	0.168	0.166	0.159	0.16	0.159	0.168	0.17	0.195	0.185	0.176	0.18	0.172	0.178	0.164	0.164	0.166	0.17	0.159	0.17	0.164	0.166	0.164	0.176	0.176	0.17	0.214	0.21	0.199	0.159	0.157	0.207	0.203	0.184	0.185	0.184	0.096	0.092	0.09	0.103	0.101	0.101	0.109
50	Megophrys parva	0.163	0.18	0.176	0.157	0.163	0.176	0.163	0.151	0.178	0.16	0.163	0.163	0.157	0.155	0.157	0.138	0.143	0.153	0.161	0.147	0.145	0.163	0.149	0.141	0.153	0.151	0.147	0.161	0.153	0.151	0.149	0.197	0.174	0.182	0.149	0.157	0.184	0.201	0.176	0.164	0.178	0.149	0.149	0.138	0.141	0.145	0.14	0.138
51	Megophrys wawuensis	0.165	0.175	0.18	0.161	0.159	0.168	0.159	0.163	0.179	0.153	0.146	0.154	0.145	0.173	0.171	0.163	0.154	0.164	0.15	0.163	0.139	0.159	0.152	0.161	0.17	0.161	0.157	0.15	0.17	0.164	0.159	0.182	0.188	0.166	0.155	0.159	0.195	0.191	0.186	0.171	0.164	0.139	0.143	0.141	0.171	0.15	0.146	0.146
52	Megophrys gigantica	0.166	0.182	0.186	0.152	0.168	0.171	0.17	0.175	0.175	0.153	0.159	0.174	0.161	0.171	0.173	0.168	0.163	0.177	0.166	0.164	0.157	0.179	0.177	0.161	0.175	0.164	0.173	0.163	0.179	0.173	0.168	0.202	0.184	0.182	0.173	0.188	0.207	0.196	0.195	0.195	0.175	0.15	0.152	0.152	0.175	0.162	0.159	0.171
53	Megophrys shapingensis	0.168	0.179	0.186	0.157	0.168	0.164	0.164	0.168	0.171	0.158	0.139	0.146	0.155	0.173	0.171	0.155	0.151	0.171	0.157	0.149	0.144	0.155	0.15	0.144	0.159	0.162	0.153	0.148	0.166	0.16	0.15	0.198	0.178	0.184	0.159	0.175	0.191	0.193	0.182	0.184	0.169	0.132	0.144	0.142	0.164	0.151	0.148	0.139
54	Megophrys montana	0.204	0.206	0.214	0.2	0.225	0.207	0.211	0.223	0.204	0.202	0.209	0.211	0.204	0.214	0.221	0.22	0.221	0.221	0.22	0.208	0.225	0.227	0.22	0.2	0.214	0.216	0.213	0.216	0.22	0.218	0.214	0.198	0.221	0.213	0.209	0.218	0.202	0.213	0.229	0.209	0.207	0.211	0.205	0.193	0.205	0.208	0.198	0.205
55	Megophrys feae	0.188	0.19	0.191	0.189	0.195	0.207	0.195	0.198	0.186	0.189	0.182	0.195	0.184	0.175	0.175	0.18	0.182	0.177	0.177	0.203	0.171	0.195	0.189	0.177	0.191	0.171	0.193	0.184	0.177	0.175	0.179	0.196	0.214	0.202	0.193	0.186	0.179	0.205	0.193	0.193	0.186	0.173	0.18	0.17	0.168	0.153	0.173	0.168
56	Megophrys carinense	0.193	0.199	0.198	0.193	0.202	0.205	0.195	0.2	0.202	0.197	0.182	0.179	0.173	0.179	0.184	0.182	0.182	0.189	0.186	0.199	0.184	0.198	0.182	0.17	0.193	0.173	0.2	0.2	0.196	0.196	0.189	0.195	0.211	0.2	0.173	0.188	0.184	0.207	0.202	0.179	0.18	0.182	0.184	0.171	0.188	0.173	0.171	0.168
[truncated: 7 more columns]
